# Supplementary material for: Spectroscopic evidence that Li doping creates shallow VZnin ZnO
Source: Royal Society of Chemistry journal article supplement (doi:10.1039/c6cp08012j), 2017-01-01
Supplement: c6cp08012j1.pdf [file c6cp08012j1.pdf]

## Supplementary Material

### Spectroscopic evidence for Li doping creation shallow $V_{Zn}$ in ZnO

Jinpeng Lv <sup>1</sup>□, Yuan Liu <sup>2</sup>

<sup>1</sup> College of Astronautics, Nanjing University of Aeronautics and Astronautics, Nanjing, PR China

<sup>2</sup> Department of Chemistry, Dartmouth College, Hanover, NH 03755, USA

\* Corresponding author. E-mail address: [hitljp@gmail.com](mailto:hitljp@gmail.com)

Supplementary information:

ZnO nanoparticles with mean particle sizes in the range of 50~90 nm (Sigma-Aldrich, 99.99%) were also employed to verify the reproducibility of the 3 eV emission induced by  $H_2O_2$  oxidation. As shown in Figure.S1, treating with diluted  $H_2O_2$  solution (6 wt %) suppressed donor defects and produced the 414 nm emission. Further increase  $H_2O_2$  solution concentration to above 10 % can fully remove the donor-bound exciton at 368 nm and generated the deep level emission at 550 nm. These phenomena apparently demonstrate that abundant  $V_{Zn}$  were created after  $H_2O_2$  treatment.

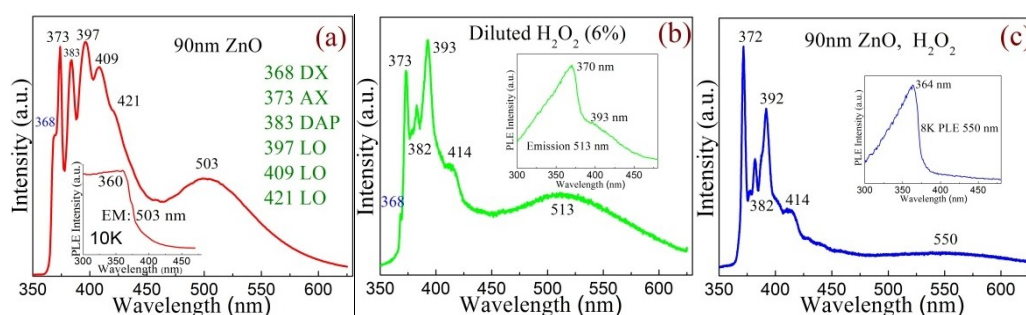

**Fig. S1.** 10 K PL spectra of pristine 90 nm ZnO (a), treated with 6 %  $H_2O_2$  (b) and 30%  $H_2O_2$  solution (c). The inset shows the corresponding PLE spectra for the green emission. All of the spectra are recorded at 10 K.
